# Supplementary material for: A ‘new lease of life’: FnCpf1 possesses DNA cleavage activity for genome editing in human cells
Source: Oxford University Press journal article supplement (doi:10.1093/nar/gkx783), 2017-09-05
Supplement: gkx783_supp.pdf [file gkx783_supp.pdf]

## Supplementary Data

### **A “new lease of life”: FnCpf1 possesses DNA cleavage activity for genome editing in human cells**

Mengjun Tu<sup>1</sup>, Li Lin<sup>1</sup>, Yilu Cheng<sup>2</sup>, Xiubin He<sup>1</sup>, Huihui Sun<sup>1</sup>, Haihua Xie<sup>1</sup>, Junhao Fu<sup>1</sup>, Changbao Liu<sup>2</sup>, Jin Li<sup>1</sup>, Ding Chen<sup>1</sup>, Haitao Xi<sup>2</sup>, Dongyu Xue<sup>3</sup>, Qi Liu<sup>3</sup>, Junzhao Zhao<sup>2</sup>, Caixia Gao<sup>4</sup>, Zongming Song<sup>1</sup>, Jia Qu<sup>1</sup> and Feng Gu<sup>1,\*</sup>

<sup>1</sup>School of Ophthalmology and Optometry, Eye Hospital, Wenzhou Medical University, State Key Laboratory Cultivation Base and Key Laboratory of Vision Science, Ministry of Health and Zhejiang Provincial Key Laboratory of Ophthalmology and Optometry, Wenzhou, Zhejiang 325027 China

<sup>2</sup>The Second Affiliated Hospital and Yuying Children's Hospital of Wenzhou Medical University, Wenzhou, Zhejiang 325000 China

<sup>3</sup>Department of Central Laboratory, Shanghai Tenth People's Hospital, School of Life Sciences and Technology, Tongji University, Shanghai 200072 China.

<sup>4</sup>Institute of Genetics and Developmental Biology, Chinese Academy of Sciences, Beijing 100101 China.

**\* To whom correspondence should be addressed. Tel: +86-577-8883 1367; Fax: +86-577-8883 1367; Email: [gufenguw@gmail.com](mailto:gufenguw@gmail.com)**

# **Supplementary Data**

## **Table of Contents**

### **1, Supplementary Figures**

Supplementary Figure 1

Supplementary Figure 2

Supplementary Figure 3

Supplementary Figure 4

Supplementary Figure 5

Supplementary Figure 6

Supplementary Figure 7

Supplementary Figure 8

Supplementary Figure 9

Supplementary Figure 10

### **2, Supplementary tables**

Supplementary Table 1

Supplementary Table 2

Supplementary Table 3

Supplementary Table 4

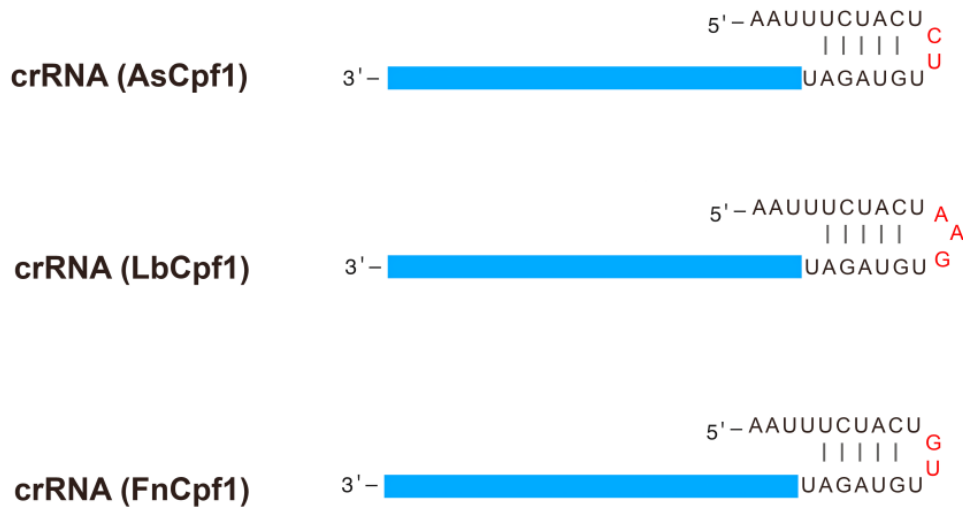

**Figure S1. Schematic representation of three crRNA structures.**

The difference among these three Cpf1 (AsCpf1, LbCpf1 and FnCpf1) family members is shown in red.

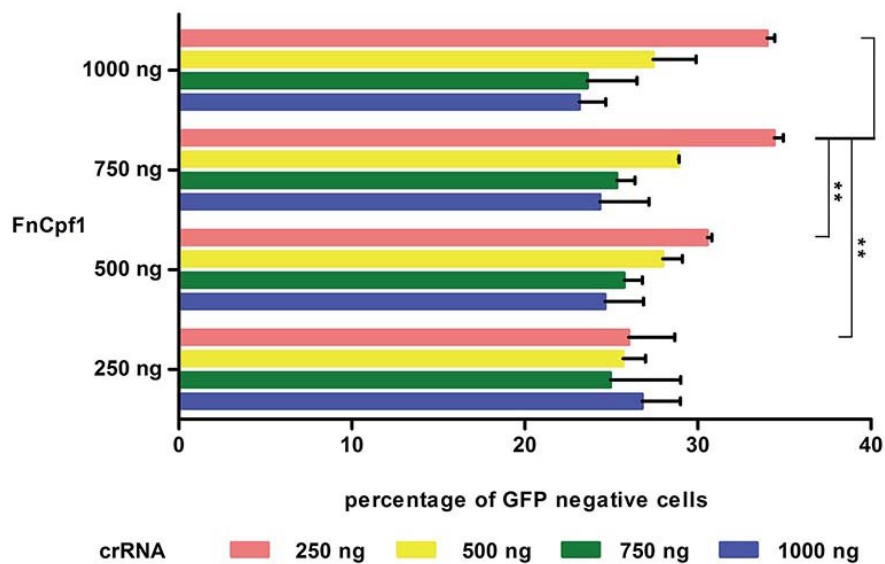

**Figure S2. The effects of plasmids amount for the cleavage.**

The cells were co-transfected with different amounts of expression plasmids for FnCpf1 and crRNA. The cleavage was saturated with 750 ng and 250 ng plasmids coding for FnCpf and crRNA, respectively. Error bars, s.e.m.; n=3.

\*\*P < 0.01.

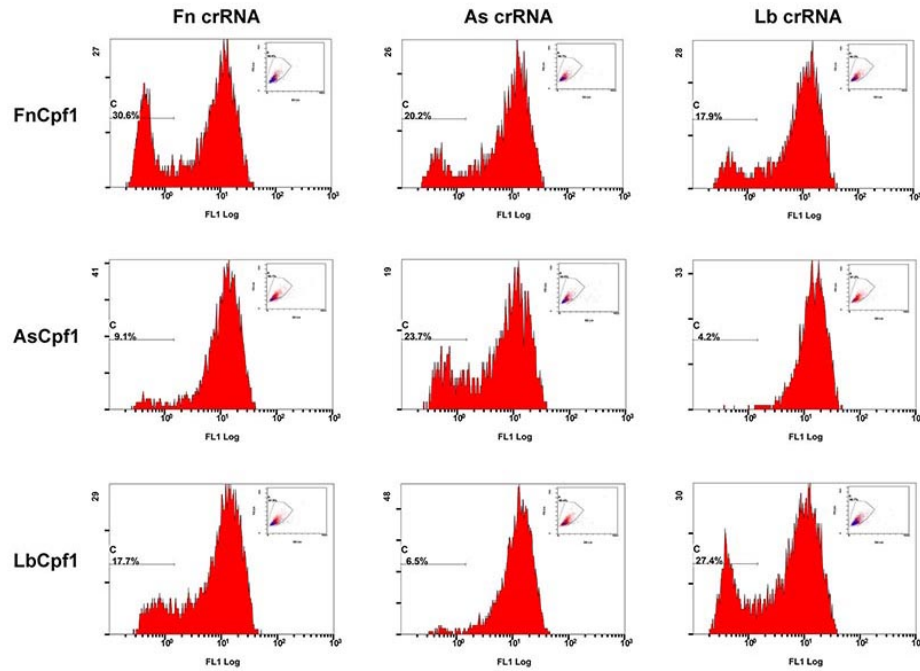

**Figure S3. The cleavage efficiency of different Cpf1 with three different direct repeats.**

The cleavage was the highest under the condition of each Cpf1 ortholog (FnCpf1, AsCpf1 and LbCpf1) with its own direct repeat.

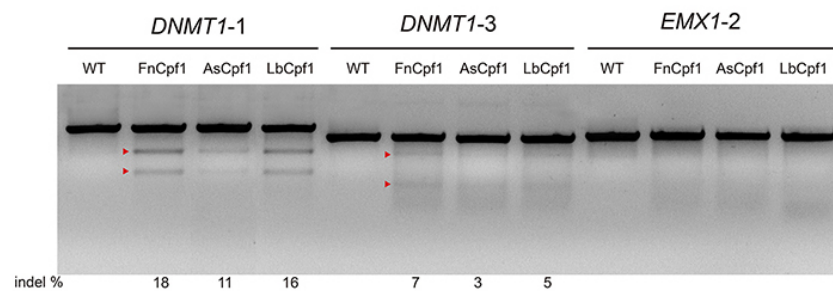

**Figure S4. Gene-editing efficiency at *DNMT1* and *EMX1* loci**

DNA cleavage has been observed at *DNMT1-1* and *DNMT1-3* with FnCpf1, respectively. No activity has been detected at *EMX1-2* with FnCpf1, AsCpf1 and LbCpf1. Bands marker with red arrow is the cleavage bands.

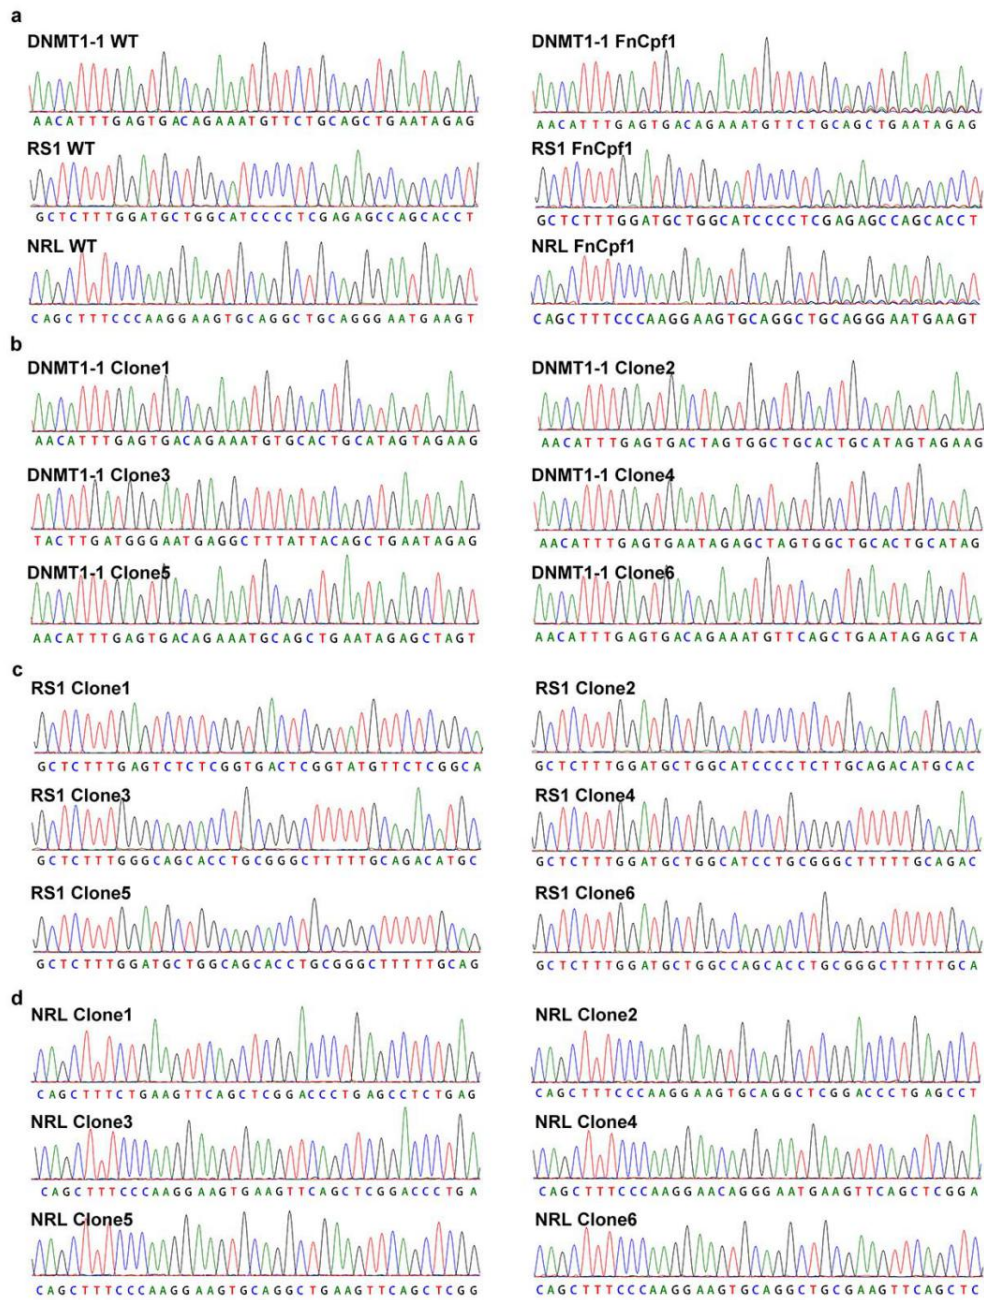

**Figure S5. DNA sequencing chromatograms of *DNMT1-1*, *RS1* and *NRL* loci.**

(a) DNA sequencing chromatograms of the fragment with PCR templates from the cells transfected with FnCpf1 has additional peaks, compared with that of no transfection. (b,c,d) DNA sequence analysis of single individual clone with indel.

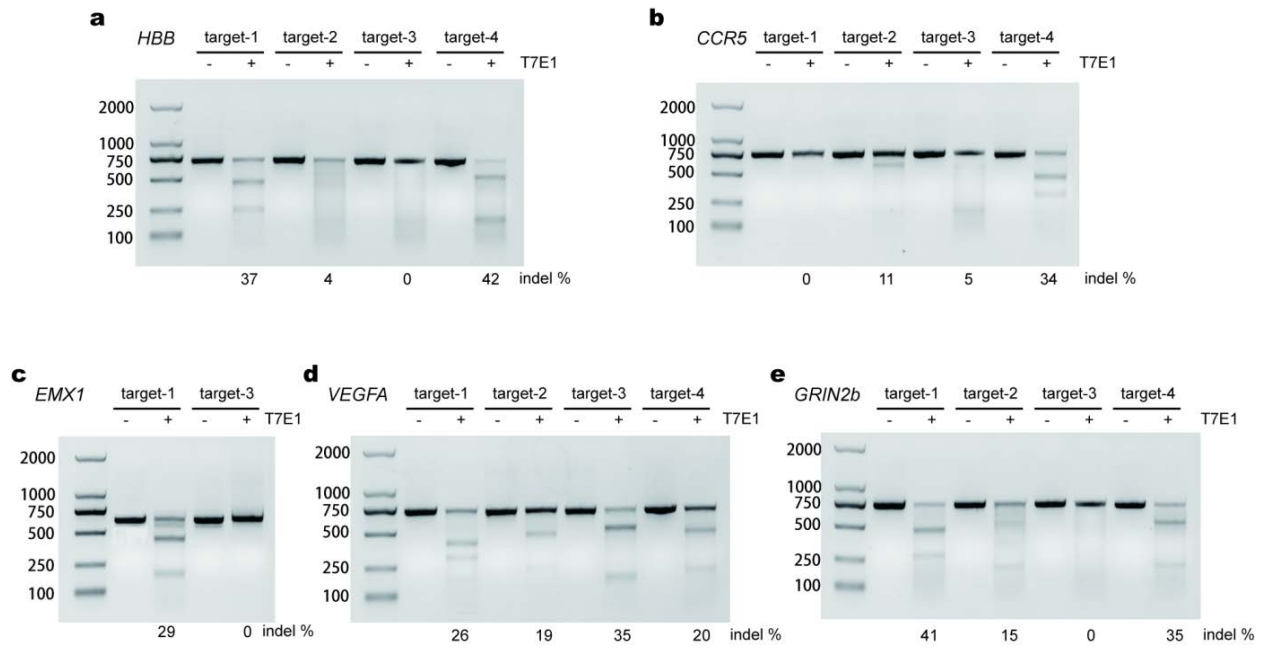

**Figure S6. FnCpf1 mediated gene-editing at multiple human genomic loci.**

FnCpf1 has the activity at *HBB*, *CCR5*, *EMX1*, *VEGFA*, and *GRIN2b*. We observed different activities with the different crRNA targeting the same gene.

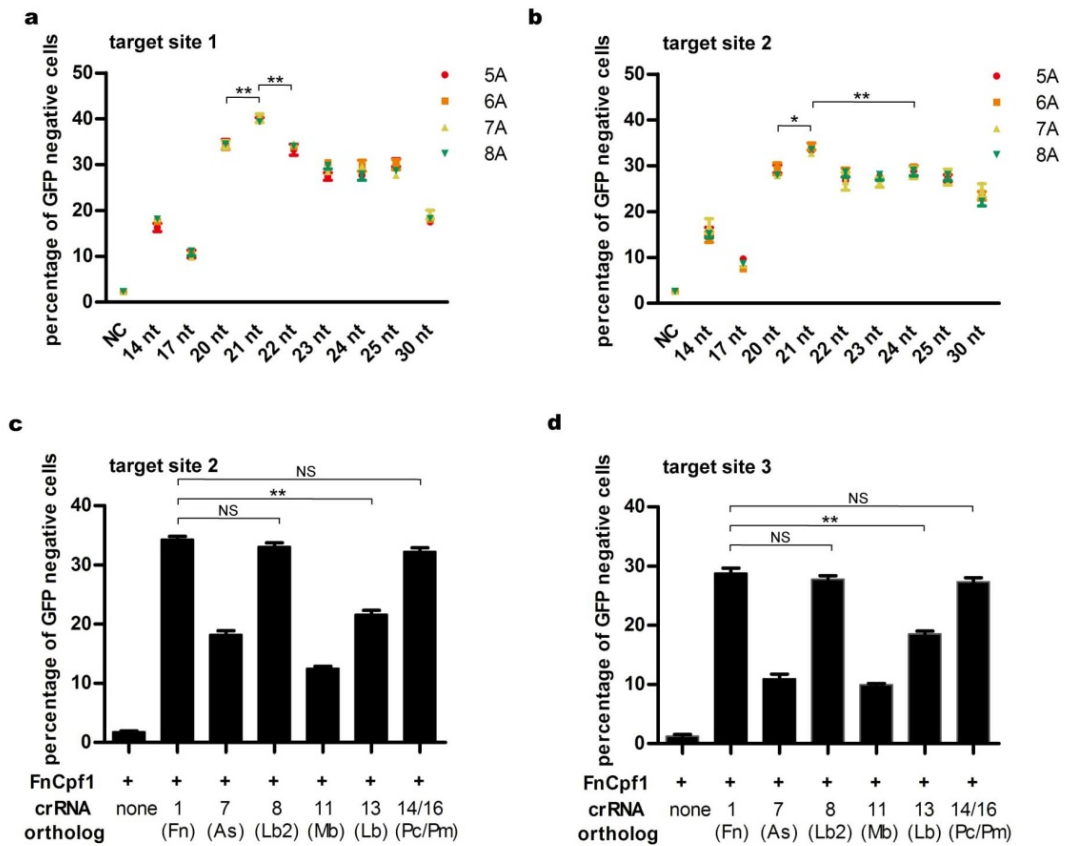

**Figure S7. The effects of U length and direct repeats on FnCpf1-mediated gene editing in human cells**

(a,b) With different U length of crRNA, no significant difference has been observed. (c,d) Direct repeats from Lb2Cpf1, Pc/PmCpf1 had the same DNA cleavage efficiency as direct repeats from FnCpf1 when they were used with FnCpf1. Error bars, s.e.m.; n=3. \*\*P < 0.01. NS: not significant.

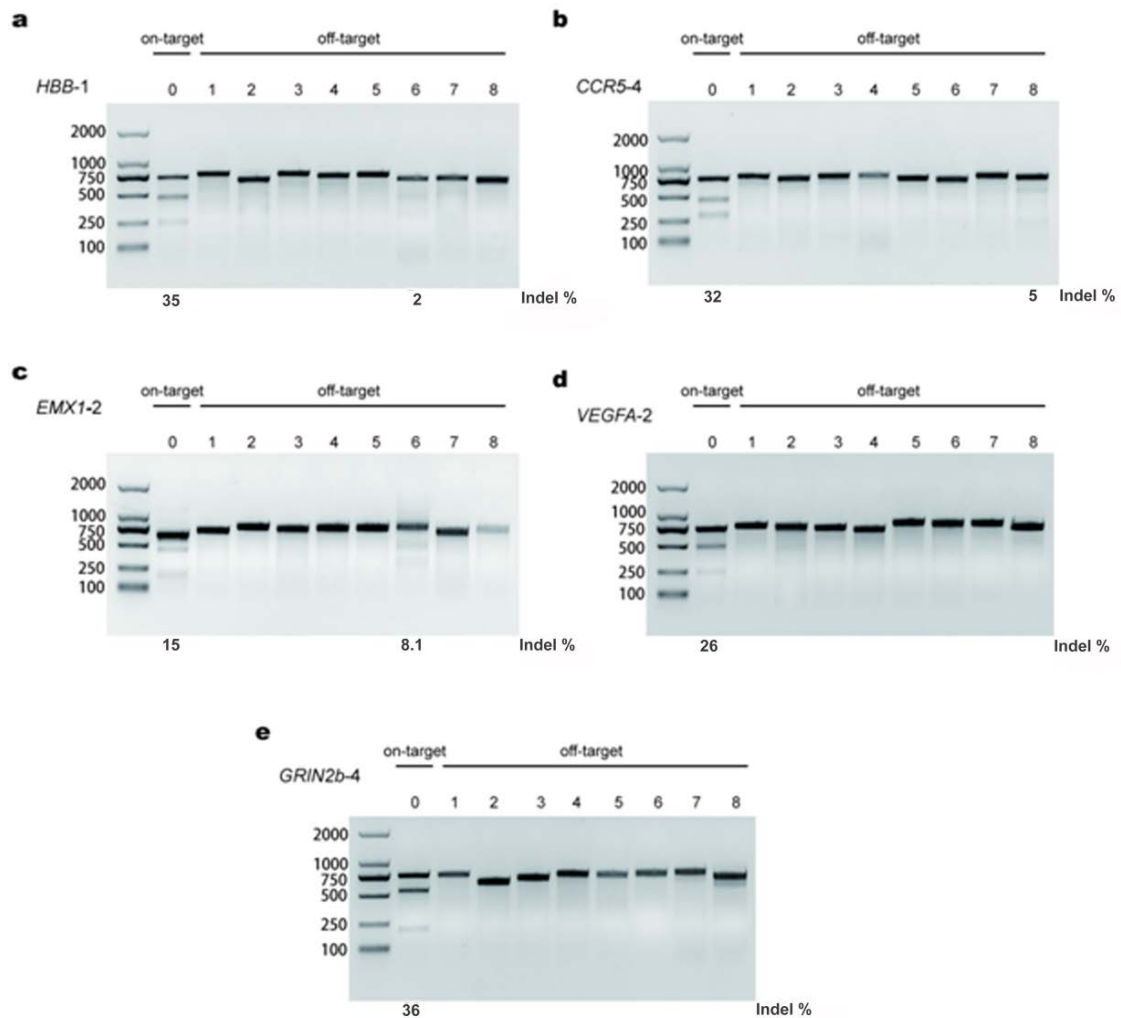

**Figure S8. Off-target effects of FnCpf1-mediated gene editing in human cells**

The off-target sites were predicted with online software

(<http://www.rgenome.net/cas-offinder/>). Off-targets of five target sequence at

different genes were investigated. The results showed that there are

detectable off-target effects of FnCpf1 at endogenous genes (*HBB*, Off-target 6;

*CCR5*, Off-target 8; *EMX1*, Off-target 6).



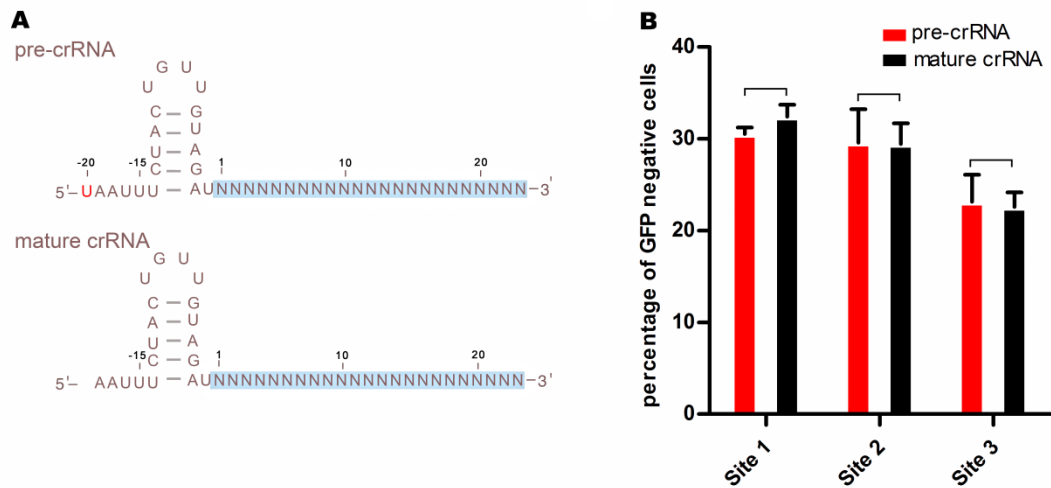

**Figure S9. The activities of the pre-crRNA and the mature crRNA.**

(a) Schematic representation of pre-crRNA (U+) and mature crRNA (U-) structures. The difference between these two crRNAs is shown in red. (b) Effects of pre-crRNA and mature crRNA on the ability to induce indels at three *GFP* targets. The results show no difference between two groups ( $P > 0.05$ ). Error bars, s.e.m.;  $n = 3$ . Significance was calculated using Student's t-test.

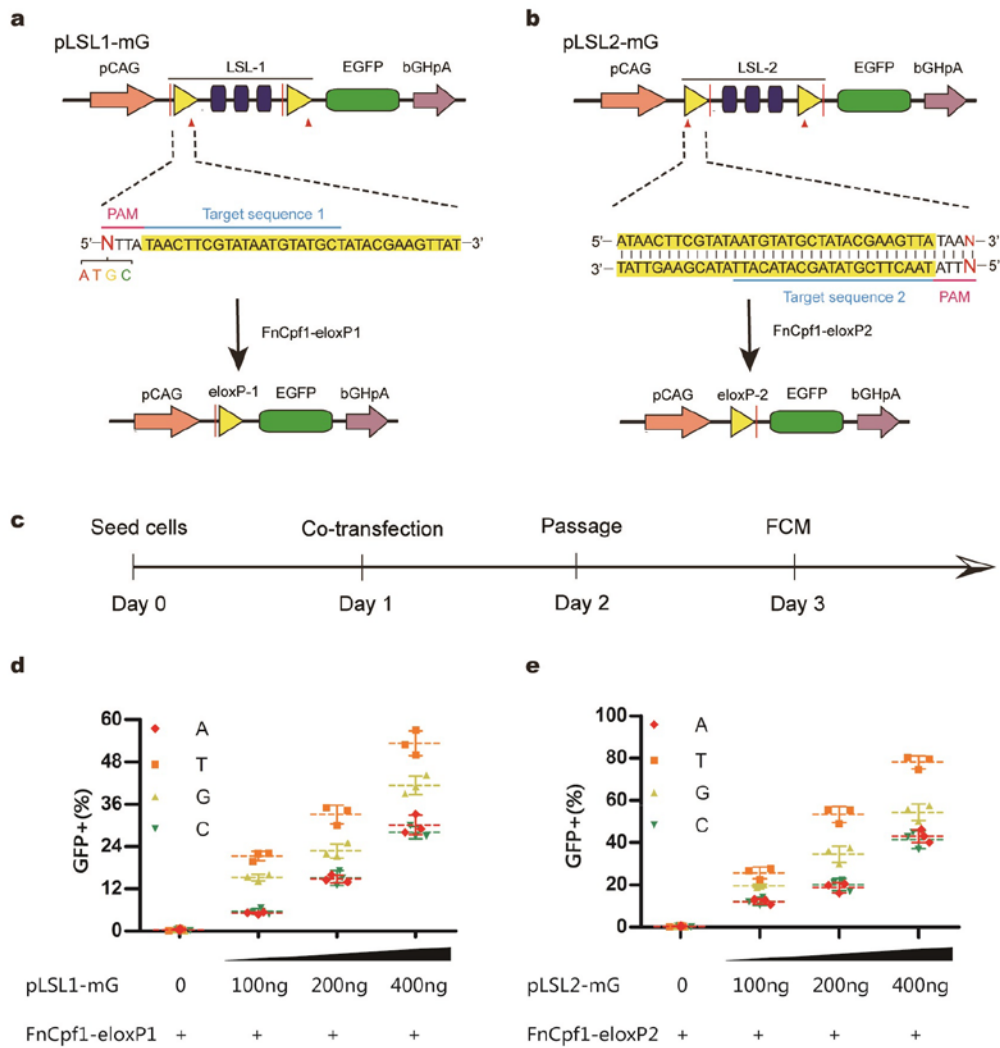

**Figure S10. Effects of fourth position of the FnCpf1 PAM for the cleavage**

(a,b) Schematic representation and target/PAM information of loxP-STOP-loxP-mG/FnCpf1. After the FnCpf1 mediated DNA double strands break via targeting loxP flanking STOP-cassette, the expression of the *EGFP* gene would be directly driven by the CAG promoter. (c) Illustration of protocol used for loxP-STOP-loxP/FnCpf1. (d,e) Co-transfection of 250 ng plasmids coding for FnCpf1 and 100 ng plasmids coding for crRNA target loxP (labeled these two plasmids as FnCpf1-eloxP) plus different amount of plasmid harboring loxP-STOP-loxP-mG fragment (labeled as pLSL-mG) per well in a 12-well plate. With the increase of the pLSL-mG, more cells in green have been observed. G and T at fourth position of PAM have higher cleavage efficiency, compared with A and C.

**Supplementary Table 1. Different crRNA sequences with Cpf1 orthologs.**

| Primer Description                        | Primer sequence (5`-3`)                                 |
|-------------------------------------------|---------------------------------------------------------|
| <b>AsCpf1 crRNA with TTTN PAM</b>         | CAAAAAACCTGGTCGAGCTGGACGGCGACGATCTACAAGAGTAGAAATTCGGTG  |
| <b>AsCpf1 crRNA with GCTN PAM</b>         | CAAAAAACGTGCTGCTTCATGTGGTCGGGGATCTACAAGAGTAGAAATTCGGTG  |
| <b>AsCpf1 crRNA with CATN PAM</b>         | CAAAAAATGCTTCAGCCGCTACCCCGACCAATCTACAAGAGTAGAAATTCGGTG  |
| <b>LbCpf1 crRNA with TTTN PAM</b>         | CAAAAAACCTGGTCGAGCTGGACGGCGACGATCTACACTTAGTAGAAATTCGGTG |
| <b>LbCpf1 crRNA with GCTN PAM</b>         | CAAAAAACGTGCTGCTTCATGTGGTCGGGGATCTACACTTAGTAGAAATTCGGTG |
| <b>LbCpf1 crRNA with CATN PAM</b>         | CAAAAAATGCTTCAGCCGCTACCCCGACCAATCTACACTTAGTAGAAATTCGGTG |
| <b>FnCpf1 crRNA at <i>DNMT1-1</i></b>     | CAAAAAAGCTGCAGAACATTTCTGTCACTATCTACAACAGTAGAAATTCGGTG   |
| <b>AsCpf1 crRNA at <i>DNMT1-1</i></b>     | CAAAAAAGCTGCAGAACATTTCTGTCACTATCTACAAGAGTAGAAATTCGGTG   |
| <b>LbCpf1 crRNA at <i>DNMT1-1</i></b>     | CAAAAAAGCTGCAGAACATTTCTGTCACTATCTACACTTAGTAGAAATTCGGTG  |
| <b>FnCpf1 crRNA at <i>RS1</i></b>         | CAAAAAAGCTCTCGAGGGGATGCCAGCATCATCTACAACAGTAGAAATTCGGTG  |
| <b>AsCpf1 crRNA at <i>RS1</i></b>         | CAAAAAAGCTCTCGAGGGGATGCCAGCATCATCTACAAGAGTAGAAATTCGGTG  |
| <b>LbCpf1 crRNA at <i>RS1</i></b>         | CAAAAAAGCTCTCGAGGGGATGCCAGCATCATCTACACTTAGTAGAAATTCGGTG |
| <b>FnCpf1 crRNA at <i>NRL</i></b>         | CAAAAAACCTGCAGCCTGCACTTCCTTGGATCTACAACAGTAGAAATTCGGTG   |
| <b>AsCpf1 crRNA at <i>NRL</i></b>         | CAAAAAACCTGCAGCCTGCACTTCCTTGGATCTACAAGAGTAGAAATTCGGTG   |
| <b>LbCpf1 crRNA at <i>NRL</i></b>         | CAAAAAACCTGCAGCCTGCACTTCCTTGGATCTACACTTAGTAGAAATTCGGTG  |
| <b>FnCpf1 crRNA at <i>DNMT1-3</i></b>     | CAAAAAAGAGTAACAGACATGGACCATCAGATCTACAACAGTAGAAATTCGGTG  |
| <b>AsCpf1 crRNA at <i>DNMT1-3</i></b>     | CAAAAAAGAGTAACAGACATGGACCATCAGATCTACAAGAGTAGAAATTCGGTG  |
| <b>LbCpf1 crRNA at <i>DNMT1-3</i></b>     | CAAAAAAGAGTAACAGACATGGACCATCAGATCTACACTTAGTAGAAATTCGGTG |
| <b>FnCpf1 crRNA at <i>EMX1-2</i></b>      | CAAAAAAGGTGTGGTTCCAGAACCGGAGGAATCTACAACAGTAGAAATTCGGTG  |
| <b>AsCpf1 crRNA at <i>EMX1-2</i></b>      | CAAAAAAGGTGTGGTTCCAGAACCGGAGGAATCTACAAGAGTAGAAATTCGGTG  |
| <b>LbCpf1 crRNA at <i>EMX1-2</i></b>      | CAAAAAAGGTGTGGTTCCAGAACCGGAGGAATCTACACTTAGTAGAAATTCGGTG |
| <b>FnCpf1 crRNA at <i>GFP site 1</i></b>  | CAAAAAATGGTCGAGCTGGACGGCGACGATCTACAACAGTAGAAATTCGGTG    |
| <b>Lb3Cpf1 crRNA at <i>GFP site 1</i></b> | CAAAAAATGGTCGAGCTGGACGGCGACGGCATGAGAACCATGCTTTCTCGGTG   |
| <b>BpCpf1 crRNA at <i>GFP site 1</i></b>  | CAAAAAATGGTCGAGCTGGACGGCGACGACCTAATTACTAGGTAATTTTCGGTG  |
| <b>PeCpf1 crRNA at <i>GFP site 1</i></b>  | CAAAAAATGGTCGAGCTGGACGGCGACGATCTACAAAAGTAGAAATTCGGTG    |
| <b>PbCpf1 crRNA at <i>GFP site 1</i></b>  | CAAAAAATGGTCGAGCTGGACGGCGACGATCTACAAAAGTAGAAATTCGGTG    |
| <b>SsCpf1 crRNA at <i>GFP site 1</i></b>  | CAAAAAATGGTCGAGCTGGACGGCGACGGTCGCGCCCCGCTGGGCGCGCGGTG   |
| <b>AsCpf1 crRNA at <i>GFP site 1</i></b>  | CAAAAAATGGTCGAGCTGGACGGCGACGATCTACAAGAGTAGAAATTCGGTG    |
| <b>Lb2Cpf1 crRNA at <i>GFP site 1</i></b> | CAAAAAATGGTCGAGCTGGACGGCGACGATCTACAATAGTAGAAATTCGGTG    |
| <b>CMtCpf1 crRNA at <i>GFP site 1</i></b> | CAAAAAATGGTCGAGCTGGACGGCGACGATCTACAAAGAGTAGAGATTCGGTG   |
| <b>EeCpf1 crRNA at <i>GFP site 1</i></b>  | CAAAAAATGGTCGAGCTGGACGGCGACGATCTACAAAGTAGAAATTCGGTG     |
| <b>MbCpf1 crRNA at <i>GFP site 1</i></b>  | CAAAAAATGGTCGAGCTGGACGGCGACGATCTACAAACAGTAGAAATTCGGTG   |
| <b>LiCpf1 crRNA at <i>GFP site 1</i></b>  | CAAAAAATGGTCGAGCTGGACGGCGACGATCTACAAAAGTAGAAATTCGGTG    |
| <b>LbCpf1 crRNA at <i>GFP site 1</i></b>  | CAAAAAATGGTCGAGCTGGACGGCGACGATCTACACTTAGTAGAAATTCGGTG   |
| <b>PcCpf1 crRNA at <i>GFP site 1</i></b>  | CAAAAAATGGTCGAGCTGGACGGCGACGATCTACAATAGTAGAAATTCGGTG    |
| <b>PdCpf1 crRNA at <i>GFP site 1</i></b>  | CAAAAAATGGTCGAGCTGGACGGCGACGATCTACCGAAGTAGAAATTCGGTG    |
| <b>PmCpf1 crRNA at <i>GFP site 1</i></b>  | CAAAAAATGGTCGAGCTGGACGGCGACGATCTACAATAGTAGAAATTCGGTG    |
| <b>FnCpf1 crRNA at <i>GFP site 2</i></b>  | CAAAAAAGTTCACCAGGGTGTGCCCTCATCTACAACAGTAGAAATTCGGTG     |
| <b>AsCpf1 crRNA at <i>GFP site 2</i></b>  | CAAAAAAGTTCACCAGGGTGTGCCCTCATCTACAAGAGTAGAAATTCGGTG     |
| <b>Lb2Cpf1 crRNA at <i>GFP site 2</i></b> | CAAAAAAGTTCACCAGGGTGTGCCCTCATCTACAATAGTAGAAATTCGGTG     |

MbCpf1 crRNA at GFP site 2  
LbCpf1 crRNA at GFP site 2  
PcCpf1 crRNA at GFP site 2  
FnCpf1 crRNA at GFP site 3  
AsCpf1 crRNA at GFP site 3  
Lb2Cpf1 crRNA at GFP site 3  
MbCpf1 crRNA at GFP site 3  
LbCpf1 crRNA at GFP site 3  
PcCpf1 crRNA at GFP site 3  
FnCpf1 crRNA at *HBB-1*  
FnCpf1 crRNA at *HBB-2*  
FnCpf1 crRNA at *HBB-3*  
FnCpf1 crRNA at *HBB-4*  
FnCpf1 crRNA at *CCR5-1*  
FnCpf1 crRNA at *CCR5-2*  
FnCpf1 crRNA at *CCR5-3*  
FnCpf1 crRNA at *CCR5-4*  
FnCpf1 crRNA at *EMX1-1*  
FnCpf1 crRNA at *EMX1-3*  
FnCpf1 crRNA at *VEGFA-1*  
FnCpf1 crRNA at *VEGFA-2*  
FnCpf1 crRNA at *VEGFA-3*  
FnCpf1 crRNA at *VEGFA-4*  
FnCpf1 crRNA at *GRIN2b-1*  
FnCpf1 crRNA at *GRIN2b-3*  
FnCpf1 crRNA at *GRIN2b-4*  
FnCpf1 crRNA at *eIoxP1*  
FnCpf1 crRNA at *eIoxP2*

CAAAAAAGTTCACCAGGGTGTGCGCCCTCATCTACAAACAGTAGAAATTCGGTG  
CAAAAAAGTTCACCAGGGTGTGCGCCCTCATCTACACTTAGTAGAAATTCGGTG  
CAAAAAAGTTCACCAGGGTGTGCGCCCTCATCTACAATAGTAGAAATTACGGTG  
CAAAAAACATGTGGTCGGGGTAGCGGCTATCTACAACAGTAGAAATTCGGTG  
CAAAAAACATGTGGTCGGGGTAGCGGCTATCTACAAGAGTAGAAATTACGGTG  
CAAAAAACATGTGGTCGGGGTAGCGGCTATCTACAATAGTAGAAATTCGGTG  
CAAAAAACATGTGGTCGGGGTAGCGGCTATCTACAAACAGTAGAAATTCGGTG  
CAAAAAACATGTGGTCGGGGTAGCGGCTATCTACACTTAGTAGAAATTCGGTG  
CAAAAA CATGTGGTCGGGGTAGCGGCT ATCTACAATAGTAGAAATTACGGTG  
CAAAAAATATCATGCTCTTTGCACCATTCATCTACAACAGTAGAAATTCGGTG  
CAAAAAATTGTATCATTATTGCCCTGAAAGATCTACAACAGTAGAAATTCGGTG  
CAAAAAATTTCTTT CAGGGCAATAATGATAATCTACAACAGTAGAAATTCGGTG  
CAAAAAAGATATTGCTATTGCCTTAACCCAATCTACAACAGTAGAAATTCGGTG  
CAAAAAACAGCCCAGGCTGTGTATGAAAACATCTACAACAGTAGAAATTCGGTG  
CAAAAACTGCTCCCCAGTGGATCGGGTGTATCTACAACAGTAGAAATTCGGTG  
CAAAAAATCTGTGGGCTTGTGACACGGACTATCTACAACAGTAGAAATTCGGTG  
CAAAAAATTGACAACTCTCCCTTCACTCCATCTACAACAGTAGAAATTCGGTG  
CAAAAAAGGTGTGGTTCCAGAACCAGGGAATCTACAACAGTAGAAATTCGGTG  
CAAAAAATTGTACTTTGCTCCTCCGGTCTGATCTACAACAGTAGAAATTCGGTG  
CAAAAAACGTCTGCACACCCCGGCTCTGGCATCTACAACAGTAGAAATTCGGTG  
CAAAAAAGGACCCCTATTTCTGACCTCCCATCTACAACAGTAGAAATTCGGTG  
CAAAAAATGTACATGAAGCAACTCCAGTCCATCTACAACAGTAGAAATTCGGTG  
CAAAAAAGAGAGGGACACACAGATCTATTGATCTACAACAGTAGAAATTCGGTG  
CAAAAAAGTTAAAATAGGATCTACATCAGGATCTACAACAGTAGAAATTCGGTG  
CAAAAAAGGCACTTCCGACGAGGTGGCCATATCTACAACAGTAGAAATTCGGTG  
CAAAAAACAATGAAAGGAGATAAGGTCCTTATCTACAACAGTAGAAATTCGGTG  
CAAAAAAAGCATACATTATACGAAGTTAATCTACAACAGTAGAAATTCGGTG  
CAAAAAAATGTATGCTATACGAAGTTAATCTACAACAGTAGAAATTCGGTG

---

**Supplementary Table 2. Different parameter of crRNA with FnCpf1.**

| Ind                            | Primer Description | Primer sequence (5'-3')                                       |
|--------------------------------|--------------------|---------------------------------------------------------------|
| ex                             |                    |                                                               |
| <i>crRNA spacer sequence 1</i> |                    |                                                               |
| 1                              | #14nt              | CAAAAAAGCTGGACGGCGACGATCTACAACAGTAGAAATTCGGTG                 |
| 2                              | #14nt 5A           | CAAAAAGCTGGACGGCGACGATCTACAACAGTAGAAATTCGGTG                  |
| 3                              | #14nt 7A           | CAAAAAAAGCTGGACGGCGACGATCTACAACAGTAGAAATTCGGTG                |
| 4                              | #14nt 8A           | CAAAAAAAAGCTGGACGGCGACGATCTACAACAGTAGAAATTCGGTG               |
| 5                              | #17nt              | CAAAAAACGAGCTGGACGGCGACGATCTACAACAGTAGAAATTCGGTG              |
| 6                              | #17nt 5A           | CAAAAACGAGCTGGACGGCGACGATCTACAACAGTAGAAATTCGGTG               |
| 7                              | #17nt 7A           | CAAAAAACGAGCTGGACGGCGACGATCTACAACAGTAGAAATTCGGTG              |
| 8                              | #20nt              | CAAAAAAGGTCGAGCTGGACGGCGACGATCTACAACAGTAGAAATTCGGTG           |
| 9                              | #20nt 5A           | CAAAAAGGTCGAGCTGGACGGCGACGATCTACAACAGTAGAAATTCGGTG            |
| 10                             | #20nt 7A           | CAAAAAAGGTCGAGCTGGACGGCGACGATCTACAACAGTAGAAATTCGGTG           |
| 11                             | #20nt 8A           | CAAAAAAAGGTCGAGCTGGACGGCGACGATCTACAACAGTAGAAATTCGGTG          |
| 12                             | #17nt 8A           | CAAAAAAACGAGCTGGACGGCGACGATCTACAACAGTAGAAATTCGGTG             |
| 13                             | #21nt              | CAAAAAATGGTCGAGCTGGACGGCGACGATCTACAACAGTAGAAATTCGGTG          |
| 14                             | #21nt 5A           | CAAAAAATGGTCGAGCTGGACGGCGACGATCTACAACAGTAGAAATTCGGTG          |
| 15                             | #21nt 7A           | CAAAAAAATGGTCGAGCTGGACGGCGACGATCTACAACAGTAGAAATTCGGTG         |
| 16                             | #21nt 8A)          | CAAAAAAATGGTCGAGCTGGACGGCGACGATCTACAACAGTAGAAATTCGGTG         |
| 17                             | #22nt              | CAAAAAACTGGTCGAGCTGGACGGCGACGATCTACAACAGTAGAAATTCGGTG         |
| 18                             | #22nt 5A           | CAAAAAACTGGTCGAGCTGGACGGCGACGATCTACAACAGTAGAAATTCGGTG         |
| 19                             | #22nt 7A           | CAAAAAAATGGTCGAGCTGGACGGCGACGATCTACAACAGTAGAAATTCGGTG         |
| 20                             | #22nt 8A           | CAAAAAAATGGTCGAGCTGGACGGCGACGATCTACAACAGTAGAAATTCGGTG         |
| 21                             | #23nt 5A           | CAAAAACCTGGTCGAGCTGGACGGCGACGATCTACAACAGTAGAAATTCGGTG         |
| 22                             | #23nt 7A           | CAAAAAACCTGGTCGAGCTGGACGGCGACGATCTACAACAGTAGAAATTCGGTG        |
| 23                             | #23nt 8A           | CAAAAAAACCTGGTCGAGCTGGACGGCGACGATCTACAACAGTAGAAATTCGGTG       |
| 24                             | #24nt              | CAAAAAATCCTGGTCGAGCTGGACGGCGACGATCTACAACAGTAGAAATTCGGTG       |
| 25                             | #24nt 5A           | CAAAAAATCCTGGTCGAGCTGGACGGCGACGATCTACAACAGTAGAAATTCGGTG       |
| 26                             | #24nt 7A           | CAAAAAAATCCTGGTCGAGCTGGACGGCGACGATCTACAACAGTAGAAATTCGGTG      |
| 27                             | #24nt 8A           | CAAAAAAATCCTGGTCGAGCTGGACGGCGACGATCTACAACAGTAGAAATTCGGTG      |
| 28                             | #25nt              | CAAAAAATCCTGGTCGAGCTGGACGGCGACGATCTACAACAGTAGAAATTCGGTG       |
| 29                             | #25nt 5A           | CAAAAAATGCCATCCTGGTCGAGCTGGACGGCGACGATCTACAACAGTAGAAATTCGGTG  |
| 30                             | #25nt 7A           | CAAAAAATGCCATCCTGGTCGAGCTGGACGGCGACGATCTACAACAGTAGAAATTCGGTG  |
| 31                             | #25nt 8A           | CAAAAAAATGCCATCCTGGTCGAGCTGGACGGCGACGATCTACAACAGTAGAAATTCGGTG |
| 32                             | #30nt              | CAAAAAATGCCATCCTGGTCGAGCTGGACGGCGACGATCTACAACAGTAGAAATTCGGTG  |
| 33                             | #30nt 5A           | CAAAAAAGGGTGTGCCCTCATCTACAACAGTAGAAATTCGGTG                   |
| 34                             | #30nt 7A           | CAAAAAAAGGGTGTGCCCTCATCTACAACAGTAGAAATTCGGTG                  |
| 35                             | #30nt 8A           | CAAAAAAAGGGTGTGCCCTCATCTACAACAGTAGAAATTCGGTG                  |
| <i>crRNA spacer sequence 2</i> |                    |                                                               |
| 36                             | #14nt              | CAAAAAAGGGTGTGCCCTCATCTACAACAGTAGAAATTCGGTG                   |
| 37                             | #14nt 5A           | CAAAAAAGGGTGTGCCCTCATCTACAACAGTAGAAATTCGGTG                   |

|    |                            |                                                                      |
|----|----------------------------|----------------------------------------------------------------------|
| 38 | #14nt 7A                   | CAAAAAAAGGGTGTGCGCCCTCATCTACAACAGTAGAAATTCGGTG                       |
| 39 | #14nt 8A                   | CAAAAAAAGGGTGTGCGCCCTCATCTACAACAGTAGAAATTCGGTG                       |
| 40 | #17nt                      | CAAAAAACCAGGGTGTGCGCCCTCATCTACAACAGTAGAAATTCGGTG                     |
| 41 | #17nt 5A                   | CAAAAAACCAGGGTGTGCGCCCTCATCTACAACAGTAGAAATTCGGTG                     |
| 42 | #17nt 7A                   | CAAAAAACCAGGGTGTGCGCCCTCATCTACAACAGTAGAAATTCGGTG                     |
| 43 | #17nt 8A                   | CAAAAAACCAGGGTGTGCGCCCTCATCTACAACAGTAGAAATTCGGTG                     |
| 44 | #20nt                      | CAAAAAATTCACCAGGGTGTGCGCCCTCATCTACAACAGTAGAAATTCGGTG                 |
| 45 | #20nt 5A                   | CAAAAAATTCACCAGGGTGTGCGCCCTCATCTACAACAGTAGAAATTCGGTG                 |
| 46 | #20nt 7A                   | CAAAAAATTCACCAGGGTGTGCGCCCTCATCTACAACAGTAGAAATTCGGTG                 |
| 47 | #20nt 8A                   | CAAAAAAATTCACCAGGGTGTGCGCCCTCATCTACAACAGTAGAAATTCGGTG                |
| 48 | #21NT                      | CAAAAAAGTTCACCAGGGTGTGCGCCCTCATCTACAACAGTAGAAATTCGGTG                |
| 49 | #21nt 5A                   | CAAAAAAGTTCACCAGGGTGTGCGCCCTCATCTACAACAGTAGAAATTCGGTG                |
| 50 | #21nt 7A                   | CAAAAAAGTTCACCAGGGTGTGCGCCCTCATCTACAACAGTAGAAATTCGGTG                |
| 51 | #21nt 8A                   | CAAAAAAAGTTCACCAGGGTGTGCGCCCTCATCTACAACAGTAGAAATTCGGTG               |
| 52 | #22nt                      | CAAAAAAGTTCACCAGGGTGTGCGCCCTCATCTACAACAGTAGAAATTCGGTG                |
| 53 | #22nt 5A                   | CAAAAAAGTTCACCAGGGTGTGCGCCCTCATCTACAACAGTAGAAATTCGGTG                |
| 54 | #22nt 7A                   | CAAAAAAGTTCACCAGGGTGTGCGCCCTCATCTACAACAGTAGAAATTCGGTG                |
| 55 | #22nt 8A                   | CAAAAAAAGTTCACCAGGGTGTGCGCCCTCATCTACAACAGTAGAAATTCGGTG               |
| 56 | #23nt 5A                   | CAAAAAACGGTTCACCAGGGTGTGCGCCCTCATCTACAACAGTAGAAATTCGGTG              |
| 57 | #23nt 7A                   | CAAAAAACGGTTCACCAGGGTGTGCGCCCTCATCTACAACAGTAGAAATTCGGTG              |
| 58 | #23nt 8A                   | CAAAAAAACGGTTCACCAGGGTGTGCGCCCTCATCTACAACAGTAGAAATTCGGTG             |
| 59 | #24nt                      | CAAAAAAGCGGTTACCAGGGTGTGCGCCCTCATCTACAACAGTAGAAATTCGGTG              |
| 60 | #24nt 5A                   | CAAAAAAGCGGTTACCAGGGTGTGCGCCCTCATCTACAACAGTAGAAATTCGGTG              |
| 61 | #24nt 7A                   | CAAAAAAGCGGTTACCAGGGTGTGCGCCCTCATCTACAACAGTAGAAATTCGGTG              |
| 62 | #24nt 8A                   | CAAAAAAAGCGGTTACCAGGGTGTGCGCCCTCATCTACAACAGTAGAAATTCGGTG             |
| 63 | #25nt                      | CAAAAAATGCGGTTACCAGGGTGTGCGCCCTCATCTACAACAGTAGAAATTCGGTG             |
| 64 | #25nt 5A                   | CAAAAAATGCGGTTACCAGGGTGTGCGCCCTCATCTACAACAGTAGAAATTCGGTG             |
| 65 | #25nt 7A                   | CAAAAAATGCGGTTACCAGGGTGTGCGCCCTCATCTACAACAGTAGAAATTCGGTG             |
| 66 | #25nt 8A                   | CAAAAAAATGCGGTTACCAGGGTGTGCGCCCTCATCTACAACAGTAGAAATTCGGT<br>G        |
| 67 | #30nt                      | CAAAAAACTCGATGCGGTTACCAGGGTGTGCGCCCTCATCTACAACAGTAGAAATTC<br>GGTG    |
| 68 | #30nt 5A                   | CAAAAAACTCGATGCGGTTACCAGGGTGTGCGCCCTCATCTACAACAGTAGAAATTCG<br>GTG    |
| 69 | #30nt 7A                   | CAAAAAAACTCGATGCGGTTACCAGGGTGTGCGCCCTCATCTACAACAGTAGAAATTC<br>CGGTG  |
| 70 | #30nt 8A                   | CAAAAAAACTCGATGCGGTTACCAGGGTGTGCGCCCTCATCTACAACAGTAGAAATTC<br>TCGGTG |
| 71 | mature crRNA at GFP site 1 | CAAAAAACCTGGTTCGAGCTGGACGGCGACGATCTACAACAGTAGAAATTCGGTG              |
| 72 | mature crRNA at GFP site 2 | CAAAAAACGGTTCACCAGGGTGTGCGCCCTCATCTACAACAGTAGAAATTCGGTG              |
| 73 | mature crRNA at GFP site 3 | CAAAAAATTCATGTGGTTCGGGGTAGCGGCTATCTACAACAGTAGAAATTCGGTG              |
| 74 | pre-crRNA at GFP site 1    | CAAAAAACCTGGTTCGAGCTGGACGGCGACGATCTACAACAGTAGAAATTCGGTG              |
| 75 | pre-crRNA at GFP site 2    | CAAAAAACGGTTCACCAGGGTGTGCGCCCTCATCTACAACAGTAGAAATTCGGTG              |
| 76 | pre-crRNA at GFP site 3    | CAAAAAATTCATGTGGTTCGGGGTAGCGGCTATCTACAACAGTAGAAATTCGGTG              |

---

|     |                                      |                                                        |
|-----|--------------------------------------|--------------------------------------------------------|
| 77  | crRNA with TTA PAM                   | CAAAAAATGGTCGAGCTGGACGGCGACGATCTACAACAGTAGAAATTCGGTG   |
| 78  | crRNA with TAA PAM                   | CAAAAAACACGCTGAACTTGTGGCCGTATCTACAACAGTAGAAATTCGGTG    |
| 79  | crRNA with TCA PAM                   | CAAAAAAGCGATGCCACCTACGGCAAGCATCTACAACAGTAGAAATTCGGTG   |
| 80  | crRNA with TGA PAM                   | CAAAAAATGAGCAAGGGCGAGGAGCTGTATCTACAACAGTAGAAATTCGGTG   |
| 81  | crRNA with ATC PAM                   | CAAAAAACGGCATCAAGGTGAACTTCAAATCTACAACAGTAGAAATTCGGTG   |
| 82  | crRNA with GTC PAM                   | CAAAAAAGTTTACGTCGCCGTCCAGCTCATCTACAACAGTAGAAATTCGGTG   |
| 83  | crRNA with CTC PAM                   | CAAAAAAGGGTGGTGCCATCCTGGTCATCTACAACAGTAGAAATTCGGTG     |
| 84  | crRNA with AAC PAM                   | CAAAAAACGGCGACGTAACGGCCACAAATCTACAACAGTAGAAATTCGGTG    |
| 85  | crRNA with AGC PAM                   | CAAAAAAGGTGAACAGCTCCTCGCCCTTATCTACAACAGTAGAAATTCGGTG   |
| 86  | crRNA with ACC PAM                   | CAAAAAAGGTGGTGCAGATGAACTTCAGATCTACAACAGTAGAAATTCGGTG   |
| 87  | crRNA with GAC PAM                   | CAAAAAACTTGTGGCCGTTTACGTCGCCATCTACAACAGTAGAAATTCGGTG   |
| 88  | crRNA with GGC PAM                   | CAAAAAAGGAGCTGTTACCCGGGGTGGTATCTACAACAGTAGAAATTCGGTG   |
| 89  | crRNA with GCC PAM                   | CAAAAAAGAGCTGGACGGCGACGTAACATCTACAACAGTAGAAATTCGGTG    |
| 90  | crRNA with CAC PAM                   | CAAAAAAGAGGAGCTGTTACCCGGGGTATCTACAACAGTAGAAATTCGGTG    |
| 91  | crRNA with CGC PAM                   | CAAAAAAGCCCGAAGGCTACGTCCAGGAATCTACAACAGTAGAAATTCGGTG   |
| 92  | crRNA with CCC PAM                   | CAAAAAAGCCGTCAGCTCGACCAGGATATCTACAACAGTAGAAATTCGGTG    |
| 93  | crRNA with TTT PAM                   | CAAAAAAGGTCGAGCTGGACGGCGACGATCTACAACAGTAGAAATTCGGTG    |
| 94  | crRNA with TTG PAM                   | CAAAAAACATCTTCTTCAAGGACGACGGATCTACAACAGTAGAAATTCGGTG   |
| 95  | crRNA with TTC PAM                   | CAAAAAACAGGATGGGCACCACCCCGGTATCTACAACAGTAGAAATTCGGTG   |
| 96  | crRNA with CTA PAM                   | CAAAAAATGCTGCTTCATGTGGTGGGGATCTACAACAGTAGAAATTCGGTG    |
| 97  | crRNA with CTT PAM                   | CAAAAAAGAGGGCGATGCCACCTACGGCATCTACAACAGTAGAAATTCGGTG   |
| 98  | crRNA with CTG PAM                   | CAAAAAAGTGGCCGTTTACGTCGCCGTCATCTACAACAGTAGAAATTCGGTG   |
| 99  | mismatch crRNA<br>spacer 21nt (C1U)  | CAAAAAATGGTCGAGCTGGACGGCGACAATCTACAACAGTAGAAATTCGGTG   |
| 100 | mismatch crRNA<br>spacer 21nt (G5A)  | CAAAAAATGGTCGAGCTGGACGGTGACGATCTACAACAGTAGAAATTCGGTG   |
| 101 | mismatch crRNA<br>spacer 21nt (C10U) | CAAAAAATGGTCGAGCTGAACGGCGACGATCTACAACAGTAGAAATTCGGTG   |
| 102 | mismatch crRNA<br>spacer 21nt (U15C) | CAAAAAATGGTCGGGCTGGACGGCGACGATCTACAACAGTAGAAATTCGGTG   |
| 103 | mismatch crRNA<br>spacer 21nt (C20U) | CAAAAAATAGTCGAGCTGGACGGCGACGATCTACAACAGTAGAAATTCGGTG   |
| 104 | mismatch crRNA<br>spacer 23nt (C1U)  | CAAAAAACCTGGTCGAGCTGGACGGCGACAATCTACAACAGTAGAAATTCGGTG |
| 105 | mismatch crRNA<br>spacer 23nt (G5A)  | CAAAAAACCTGGTCGAGCTGGACGGTGACGATCTACAACAGTAGAAATTCGGTG |
| 106 | mismatch crRNA<br>spacer 23nt (C10U) | CAAAAAACCTGGTCGAGCTGAACGGCGACGATCTACAACAGTAGAAATTCGGTG |
| 107 | mismatch crRNA<br>spacer 23nt (U15C) | CAAAAAACCTGGTCGGGCTGGACGGCGACGATCTACAACAGTAGAAATTCGGTG |
| 108 | mismatch crRNA<br>spacer 23nt (C20U) | CAAAAAACCTAGTCGAGCTGGACGGCGACGATCTACAACAGTAGAAATTCGGTG |
| 109 | Upstream loxp-GTTA                   | GACTAGTCGTTATAACTTCGTATAATGTATGC                       |
| 110 | Upstream loxp-ATTA                   | GACTAGTCATTATAACTTCGTATAATGTATGC                       |

---

|     |                                                |                                      |
|-----|------------------------------------------------|--------------------------------------|
| 111 | Upstream loxp-TTTA                             | GACTAGTCTTTATAACTTCGTATAATGTATGC     |
| 112 | Upstream loxp-CTTA                             | GACTAGTCCTTATAACTTCGTATAATGTATGC     |
| 113 | pLSL1 Downstream<br>loxp-GTTA                  | GGAATTCGTTATAACTTCGTATAGCATACAT      |
| 114 | pLSL1 Downstream<br>loxp-ATTA                  | GGAATTCATTATAACTTCGTATAGCATACAT      |
| 115 | pLSL1 Downstream<br>loxp-TTTA                  | GGAATTCCTTATAACTTCGTATAGCATACAT      |
| 116 | pLSL1 Downstream<br>loxp-CTTA                  | GGAATTCCTTATAACTTCGTATAGCATACAT      |
| 117 | PlsI2 first Downstream<br>loxp-GTTA            | GCATACATTATACGAAGTTATAACATTAAGGGTCCG |
| 118 | pLSL2 first<br>Downstream loxp-ATTA            | GCATACATTATACGAAGTTATAATATTAAGGGTCCG |
| 119 | pLSL2 first<br>Downstream loxp-TTTA            | GCATACATTATACGAAGTTATAAAATTAAGGGTCCG |
| 120 | pLSL2 first<br>Downstream loxp-CTTA            | GCATACATTATACGAAGTTATAAGATTAAGGGTCCG |
| 121 | pLSL2 second<br>Downstream universal<br>primer | GGAATTCATAACTTCGTATAGCATACAT         |

**Supplementary Table 3. Potential off-target sites of four genes.**

| Gene  | Chrom. | Position  | Target Sequence<br>(5'-3') | Mismatch | Target Primers<br>(5'-3')                                   |
|-------|--------|-----------|----------------------------|----------|-------------------------------------------------------------|
| HBB   | Chr11  | 5225953   | TTAGAATGGTGCAAAGAGGCATGA   | 0        | F:GTGTGGAAGTCTCAGGATCGT<br>R:AGGAGCTGTGGGAGGAAGAT           |
| OTS-1 | chr8   | 10253144  | CTCGAATGGTaaAAAGAGGCATtt   | 4        | F:GCTTCTGCAAATTTGGCTTCC<br>R:CCTGTTCTCAGCAGTGATTTA          |
| OTS-2 | chr8   | 69030676  | TTTGAATGGTGccAAAGAGttAaGA  | 4        | F:GGTGGTCAGCTAATTATGTGGTA<br>R:CAGGCCTCTGGCATTAAAGA         |
| OTS-3 | chr12  | 25113068  | CTGGAATGGTGCAggGAaGCcTGA   | 4        | F:CTTGGGTGTTTCAATCGTCATATT<br>R:ACAGAGATAGCCTGGAATTCATC     |
| OTS-4 | chr3   | 69071019  | TTGGAATGGaaCAAAGAGGgATGg   | 4        | F:CAGTAACAGATGCAAACCTCCTAA<br>A<br>R:CCTCCAGTTGATGTCAGAAGAG |
| OTS-5 | chr7   | 127142965 | TTGGAgTGGTGgAAAGAtGCATGg   | 4        | F:GGACAGCGAGACAGATTGATT<br>R:GCAATGATGGGCTTATGCTTATAC       |



|       |       |           |                           |   |                                                            |
|-------|-------|-----------|---------------------------|---|------------------------------------------------------------|
| OTS-6 | chr13 | 31718471  | TTAGAATGaTGCAAAaAGGCATat  | 4 | F:GTGCCTTCTCCAGACATAG<br>R:AGTGACGAAAGGAAAGGATGAG          |
| OTS-7 | chr14 | 86891761  | CTTGAATGaTGgAAAGAtGCATaA  | 4 | F:CTGGAGGTGTCTTCACATCATAG<br>R:CCCTGCACAACCTCTTATCTAC      |
| OTS-8 | chr9  | 123514207 | CTTGAATGGTGCAAtGAGGaATGc  | 3 | F:GGGCAAGGTAGGGTTCTATTT<br>R:GACCCACGATAGGCACCTTTAT        |
| CCR5  | chr3  | 46374225  | TTCGGAGTGAAGGGAGAGTTTGTC  | 0 | F:TGCTGCATCAACCCATCAT<br>R:CACAAGTCTCTCGCCTGGTT            |
| OTS-1 | chr8  | 110258614 | TTAGGAGTGgAGGGAGAGTgTgAc  | 3 | F:GAGTTGTGAGACCATGAGAAA<br>R:GAGACAGATTAATTTAAGGCCTTT      |
| OTS-2 | chr2  | 42804972  | CTTGGAGgGgAGGGAGAGTTTGTt  | 3 | F:CAGGATTCAGACACACCAGTAG<br>R:ATCCTCAAACAGGGACATTT         |
| OTS-3 | chr15 | 63193438  | TTTGGAGTGAAaGGcGAGTTgGTC  | 3 | F:GCCCAGGAGTTCAAGTTATTA<br>R:ATGCATCCATTTCCAGAGG           |
| OTS-4 | chr6  | 152746891 | TTTGGAGTiAAGGGAGAagTTGTC  | 3 | F:TGTGTGTTCTGTGATTTCTCT<br>R:CTCTGTTTGGCAGATATTTAAGA<br>T  |
| OTS-5 | chr8  | 109541705 | CTGGGAGTGAAcGcAGAGTTTccC  | 4 | F:TTGGTGATCTAGAGGCCATTTTC<br>R:TCCAGTGACTCCATTTCAAACC      |
| OTS-6 | chr12 | 41601281  | CTGGGAGTGAiGGGAGAcTTGaC   | 4 | F:AGGATGATTAAGCCATTACA<br>R:GAAACGGATTTACCCTCCTACC         |
| OTS-7 | chr5  | 138712422 | CTAGGAGTGgAGGGAGAGgaTGTg  | 4 | F:TGTTCTGGGCACAAGAAGATAG<br>R:GAGTAGCTGGGACTACAGGTAT       |
| OTS-8 | chrX  | 44120268  | TTGGGAGTGAAGGGAtAGTgTtTt  | 4 | F:TGACTCACTGCCAGACAATATG<br>R:ACAGAGGAGTAGGCTTGATCT        |
| EMX1  | chr2  | 72933793  | TTGTCCCTCCGGTTCTGGAACCACA | 0 | F:CCATCCCTTCTGTGAATGT<br>R:GGAGATTGGAGACACGGAGA            |
| OTS-1 | chr4  | 23758817  | TTTTCTCCaGTTaTGGAACCAaA   | 3 | F:AGTCACGTGAACCAGAAAGTAG<br>R:CTGAAGGGCTTGGGCTTTA          |
| OTS-2 | chr10 | 101134345 | TTGTCCgCCGGTTCTGGAACCAgg  | 3 | F:GTGACCATTAGCTCGCCTTAG<br>R:GAGAGTGTGCCAACCAGAAA          |
| OTS-3 | chr6  | 134088151 | TTCTCCTCaGGTTCTGGAACCAat  | 3 | F:GAACAGTGCAGGTAGAGATCAA<br>R:TTTTCTCCTTTCACACCTAAG        |
| OTS-4 | chr5  | 103120487 | TTCTCCTCCGGTTtTGGgcCctCA  | 4 | F:CCGAGGTGGTCTAAATTCAA<br>R:GTCCATAACTCGAGGCTAATC          |
| OTS-5 | chr1  | 2051922   | CTTTCtTcIGGTTCTGGcACCAaA  | 4 | F:GACCCGTGGGTTTGTCTT<br>R:GGAATTGGACCCGGAAT                |
| OTS-6 | chr19 | 48509366  | CTGTCCTCctGTTCTGtGtCCACA  | 4 | F:CATACAGCACTCCTTCCACTC<br>R:GTGTTGGTAGCACTCAGGAA          |
| OTS-7 | chr14 | 31356145  | CTATCtTcIGGTTCTGtAACgACA  | 4 | F:CGTTAGAACCCTACAGTCAGAATA<br>G<br>R:GACCAGGCACAGTAGTTTACA |
| OTS-8 | chr8  | 87712058  | CTCTCCTCctGTTCTGaAtCcttA  | 5 | F:AATGGAGCAGGAAGGGAATG<br>R:CTGTTGAGGCAACGATCAATTC         |

|              |              |                  |                                  |          |                                   |
|--------------|--------------|------------------|----------------------------------|----------|-----------------------------------|
| <b>VEGF</b>  | <b>chr6</b>  | <b>43769529</b>  | <b>TTGGGGAGGTCAGAAATAGGGGGT</b>  | <b>0</b> | <b>F:CTCAGCTCCACAACTTGGTGCC</b>   |
| <b>A</b>     |              |                  |                                  |          | <b>R:AGCCCGCCGCAATGAAGG</b>       |
| <b>OTS-1</b> | <b>chr8</b>  | <b>144554313</b> | <b>CTGGGGAtGTCAGgAgTAGGGGGT</b>  | <b>3</b> | <b>F:GTGGTCTGAACAGGGATCTTC</b>    |
|              |              |                  |                                  |          | <b>R:GTTGTGGCAGGGAATTAGA</b>      |
| <b>OTS-2</b> | <b>chr3</b>  | <b>39323102</b>  | <b>TTGGGGAGGTCAGtAATAGGgAT</b>   | <b>2</b> | <b>F:CAGCTCAGTTCAATTCTGTGTG</b>   |
|              |              |                  |                                  |          | <b>R:CAGAGATGGGCTCTTCTGATAAT</b>  |
| <b>OTS-3</b> | <b>chr16</b> | <b>4604192</b>   | <b>TTAGGGAGGgCAGAAATtGGGGGc</b>  | <b>3</b> | <b>F:CTGGCTTGACTTCTGACTCTC</b>    |
|              |              |                  |                                  |          | <b>R:ACGGCTTGTCTGCAAGAT</b>       |
| <b>OTS-4</b> | <b>chr13</b> | <b>67223317</b>  | <b>TTGGGGAGGTCAGAAAaAGtGgAT</b>  | <b>3</b> | <b>F:GAACATTGGAATACCCATAGGAGA</b> |
|              |              |                  |                                  |          | <b>R:CACAGGAAGAAAGGACTTTAATC</b>  |
|              |              |                  |                                  |          | <b>A</b>                          |
| <b>OTS-5</b> | <b>chr6</b>  | <b>27374720</b>  | <b>CTCcaGAGGTCAGAAATAGGtGGT</b>  | <b>3</b> | <b>F:CAGAACACACTCGCTCTTGA</b>     |
|              |              |                  |                                  |          | <b>R:CAGACAACCCTGGGAAATGTA</b>    |
| <b>OTS-6</b> | <b>chr11</b> | <b>68469846</b>  | <b>TTGGGGAGGTCAGAAAgAGGgAag</b>  | <b>4</b> | <b>F:GTAGGCACATGCTACTACACC</b>    |
|              |              |                  |                                  |          | <b>R:TCCCTCCACTCCTTCTGT</b>       |
| <b>OTS-7</b> | <b>chr14</b> | <b>91353588</b>  | <b>TTGGGGAGGTCAGAAgTcGGGccT</b>  | <b>4</b> | <b>F:GCACATTCTTGCACTCTTC</b>      |
|              |              |                  |                                  |          | <b>R:ATCCCACCGAAGCCATTAG</b>      |
| <b>OTS-8</b> | <b>chr16</b> | <b>84594983</b>  | <b>CTGGGGAGGTCtGAAAgAGGGGaa</b>  | <b>4</b> | <b>F:GAGTGTGTCAGAGCATCAA</b>      |
|              |              |                  |                                  |          | <b>R:AAACCACGTCCTCTTTACC</b>      |
| <b>GRIN</b>  | <b>chr12</b> | <b>13866304</b>  | <b>TTCAAGGACCTTATCTCCTTTTCA</b>  | <b>0</b> | <b>F:GCATACTCGCATGGCTACCT</b>     |
| <b>2b</b>    |              |                  |                                  |          | <b>R:CTCCCTGCAGCCCTTTTTTA</b>     |
| <b>OTS-1</b> | <b>chr5</b>  | <b>41757489</b>  | <b>CTGAAGGACCaTATCTtTTTCAT</b>   | <b>3</b> | <b>F:CCCACACACCAGTGTCTATTCT</b>   |
|              |              |                  |                                  |          | <b>R:TACTTAGCCCATCTGCCTTTG</b>    |
| <b>OTS-2</b> | <b>chr4</b>  | <b>169303367</b> | <b>CTAAAGGACCTTAcCTCCTTTcT</b>   | <b>2</b> | <b>F:TTCATCCAGGTGCCTCTAAAC</b>    |
|              |              |                  |                                  |          | <b>R:GACCAACCACAACCAAGAAAG</b>    |
| <b>OTS-3</b> | <b>chr2</b>  | <b>146415233</b> | <b>TTAAAGGACCTaATCTCtTaTCAT</b>  | <b>3</b> | <b>F:CTTCCATAATACTTCGGGTCTG</b>   |
|              |              |                  |                                  |          | <b>R:GACTCCATTTCTCAGGCATAGT</b>   |
| <b>OTS-4</b> | <b>chr6</b>  | <b>2737740</b>   | <b>CTGAAGGACaTTtTCTtTTTCAT</b>   | <b>3</b> | <b>F:GGGAGGAACGAACACATTCT</b>     |
|              |              |                  |                                  |          | <b>R:GATAGATCAGGAAGGTGGTAAT</b>   |
|              |              |                  |                                  |          | <b>C</b>                          |
| <b>OTS-5</b> | <b>chrX</b>  | <b>114935355</b> | <b>CTCAAGGACiTTAcCTCCTTTcT</b>   | <b>3</b> | <b>F:TGTGCAGGCTGTAGAGAAAG</b>     |
|              |              |                  |                                  |          | <b>R:CAAGTATGAGGGTCAGGAACAA</b>   |
| <b>OTS-6</b> | <b>chr5</b>  | <b>95047159</b>  | <b>TTCAAGGACaTcATCTaCTTTTCAT</b> | <b>3</b> | <b>F:TCTCATCCTGATCCTTCTCTC</b>    |
|              |              |                  |                                  |          | <b>R:GCAGTCATGACACACCATGTA</b>    |
| <b>OTS-7</b> | <b>chr11</b> | <b>114648765</b> | <b>CTCAAGGACiTTATCTCCTTTtT</b>   | <b>3</b> | <b>F:TCCAGGAAGACCAATGTTT</b>      |
|              |              |                  |                                  |          | <b>R:TGCTGAAGGCGAAAGGAATA</b>     |
| <b>OTS-8</b> | <b>chr13</b> | <b>46693304</b>  | <b>TTTAAGGACCcaAgCTCCTTTTCAT</b> | <b>3</b> | <b>F:GTAAC TTGCCATTGGTCACATAG</b> |
|              |              |                  |                                  |          | <b>R:CTCATGTACAGGTGAGGGAATC</b>   |

**Supplementary Table 4. U6 forward prime and Sequencing Primers.**

| <b>Locus</b>   | <b>Forward Primers<br/>(5'-3')</b> | <b>Reverse Primers<br/>(5'-3')</b> |
|----------------|------------------------------------|------------------------------------|
| <b>U6</b>      | GAGGGCCTATTTCCCATGATTCCT           | -                                  |
| <b>GFP</b>     | AAGGGCGAGGAGCTGTT                  | ACTGGGTGCTCAGGTAGTG                |
| <b>DNMT1-1</b> | CCGCAGGTGTTTGAGATTTATG             | GAGCGCGATGGCATAATCT                |
| <b>DNMT1-3</b> | CTGGGACTCAGGCGGGTCAC               | CCTCACACAACAGCTTCATGTCAGC          |
| <b>EMX1</b>    | CCATCCCCTTCTGTGAATGT               | GGAGATTGGAGACACGGAGA               |
| <b>RS1</b>     | CGGTTATCTGGCTTGACACTTG             | GTGAGGATCCCTGAAATCACTTTG           |
| <b>NRL</b>     | TTTGACAGACCTTCGCTAGTC              | CAGCAGACCGCCTACATAATC              |
| <b>HBB</b>     | GTGTGGAAGTCTCAGGATCGT              | AGGAGCTGTGGGAGGAAGAT               |
| <b>CCR5</b>    | TGCTGCATCAACCCCATCAT               | CACAAGTCTCTCGCCTGGTT               |
| <b>VEGFA</b>   | CTCAGCTCCACAACTTGGTGCC             | AGCCCGCCGCAATGAAGG                 |
| <b>GRIN2b</b>  | GCATACTCGCATGGCTACCT               | CTCCCTGCAGCCCTTTTTA                |
